# Supplementary material
Source: ML conference proceedings conference paper supplement (https://openaccess.thecvf.com/content/ICCV_2019/html/Goetschalckx_GANalyze_Toward_Visual_ICCV_2019_paper.html)
Supplement: Supplementary file 1 [file Goetschalckx_GANalyze_Toward_Visual_ICCV_2019_supplemental.pdf]

# Supplementary Materials

## 1. Non-parametric approach

GANalyze offers an alternative to the non-parametric approach in which real images are simply sorted on their memorability score to visualize what makes them memorable (example using ImageNet images [1] shown in Figure S1). The parametric, fine-grained visualizations generated by GANalyze provide much clearer visual definitions.

## 2. Extra GANalyze example image arrays

We only present a small number of GANalyze image arrays in the main paper, but include more examples here (see Figures S2, S3, S4, and S5. In addition, the GANalyze project page: <http://ganalyze.csail.mit.edu/>, offers a tool to help explore even more examples in a more convenient manner.

## References

- [1] Olga Russakovsky, Jia Deng, Hao Su, Jonathan Krause, Sanjeev Satheesh, Sean Ma, Zhiheng Huang, Andrej Karpathy, Aditya Khosla, Michael Bernstein, Alexander C. Berg, and Li Fei-Fei. Imagenet large scale visual recognition challenge. *Int. J. Comput. Vision*, 115(3):211–252, Dec. 2015.

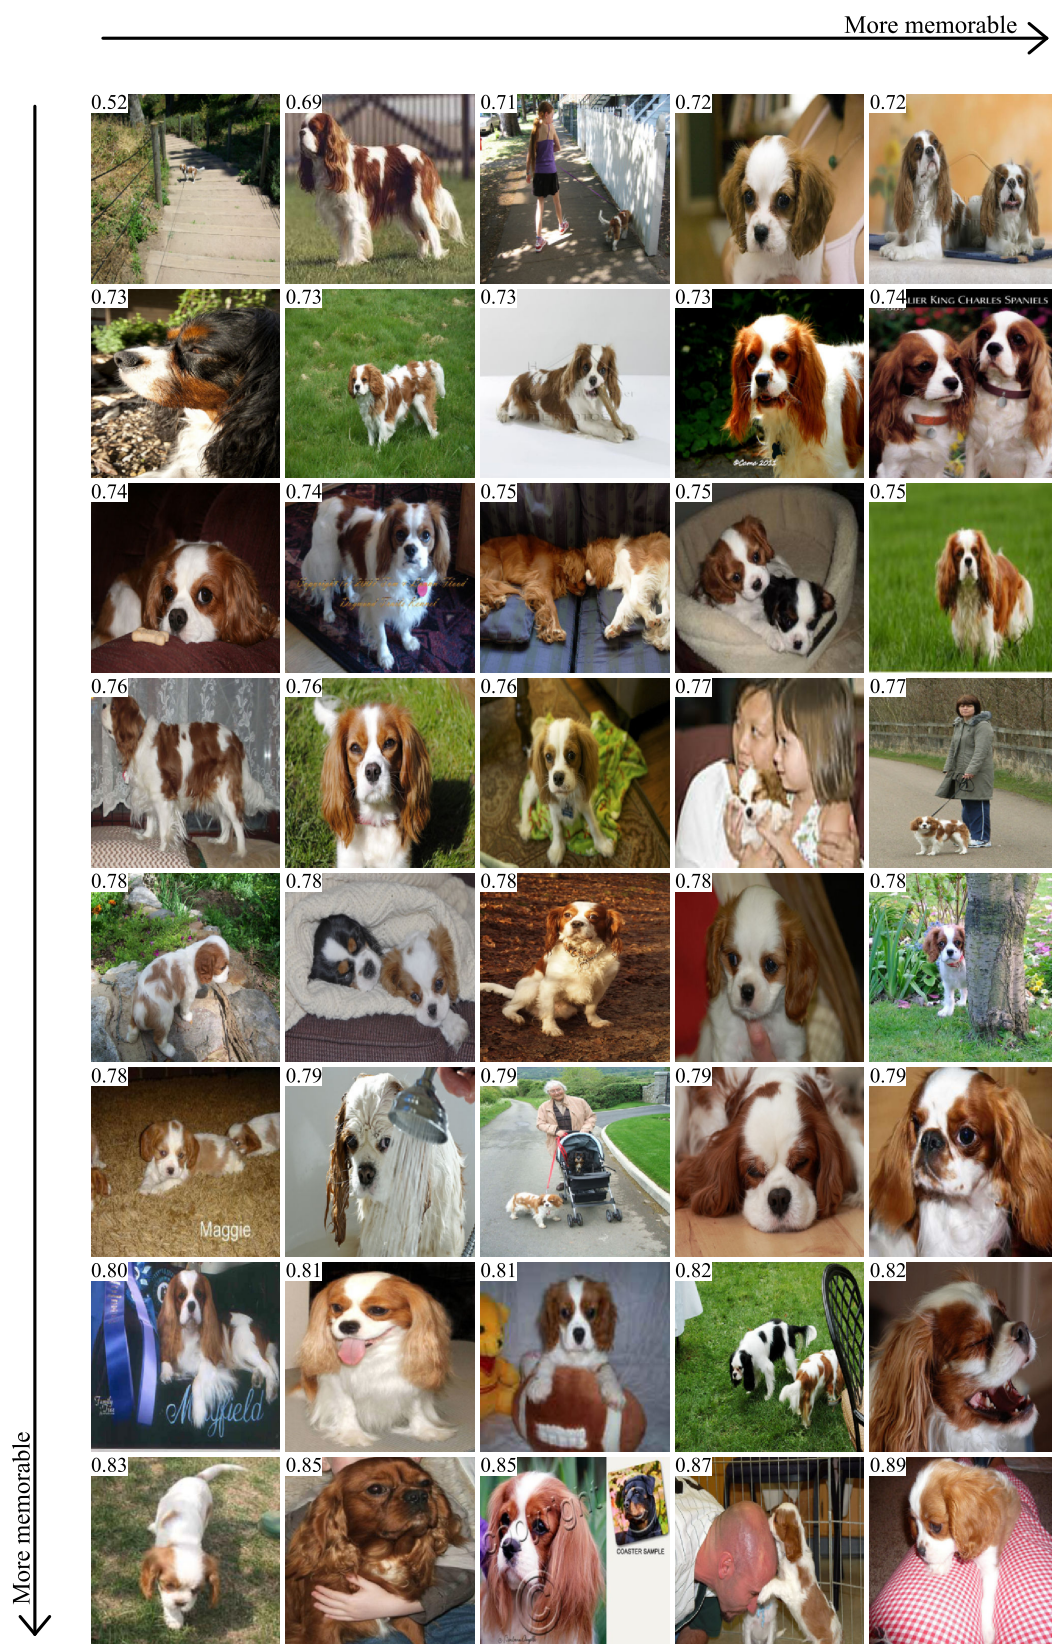

**Figure S1. Real images sorted on their MemNet score.** As opposed to GANalyze, this is a non-parametric way of visualizing what it looks like for images to become more memorable.



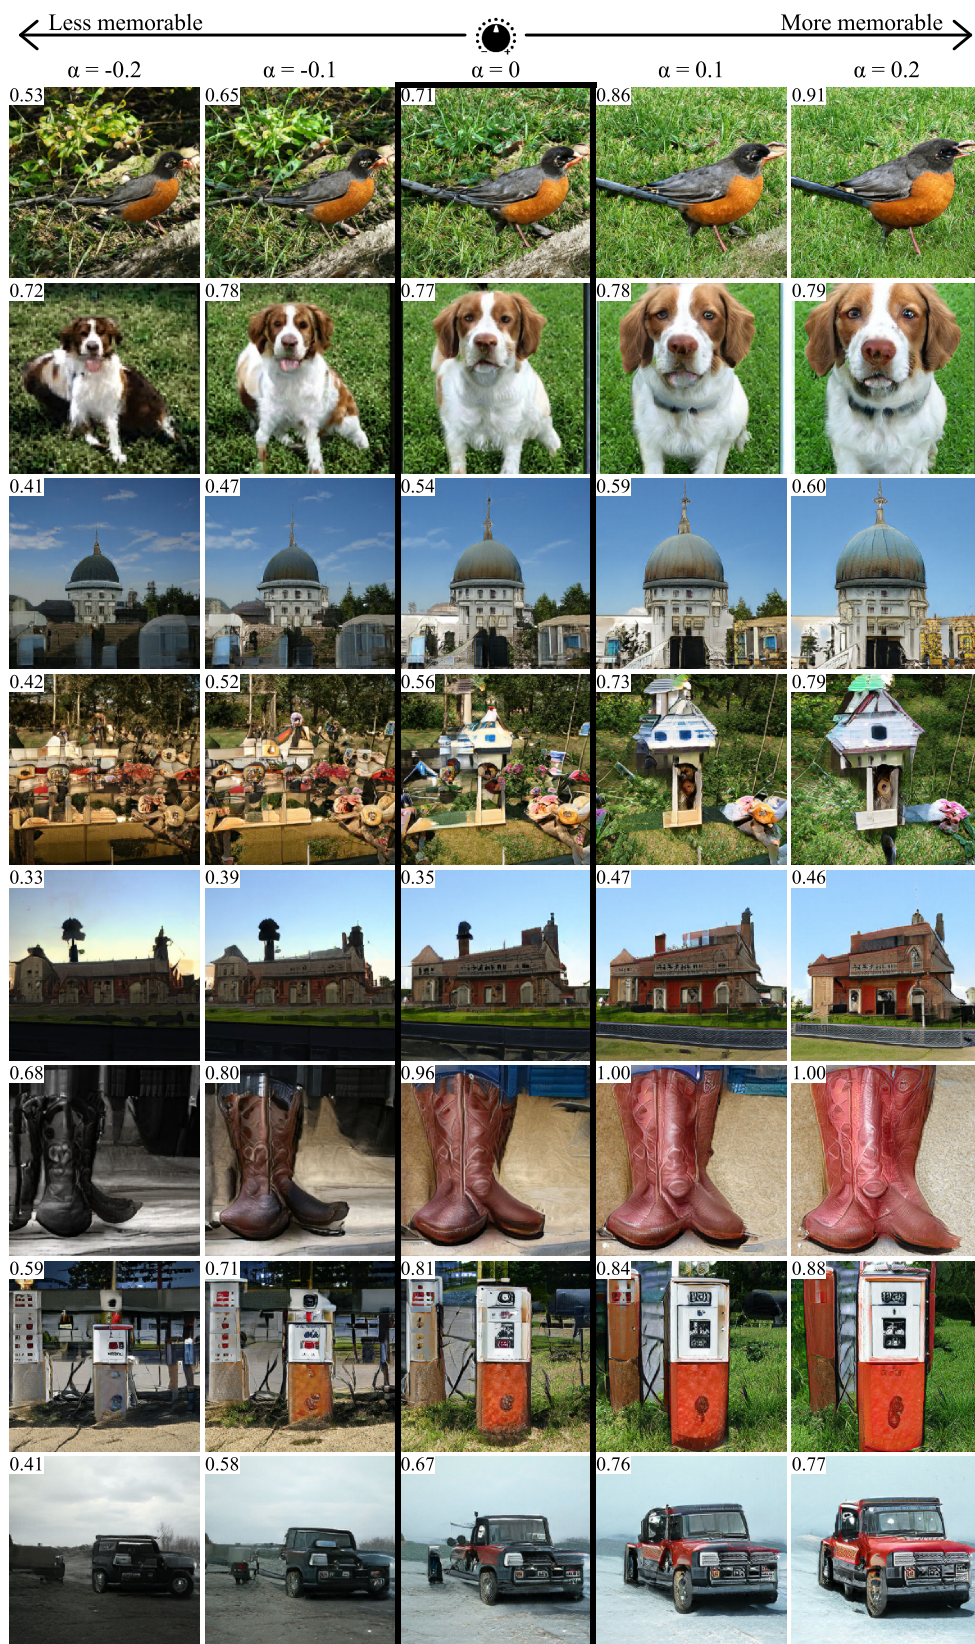

**Figure S2. More examples of generated images along the memorability dimension.** The middle column represents  $G(\mathbf{z}, \mathbf{y})$ , the generated image serving as the original seed to create a series of clone images more or less memorable.



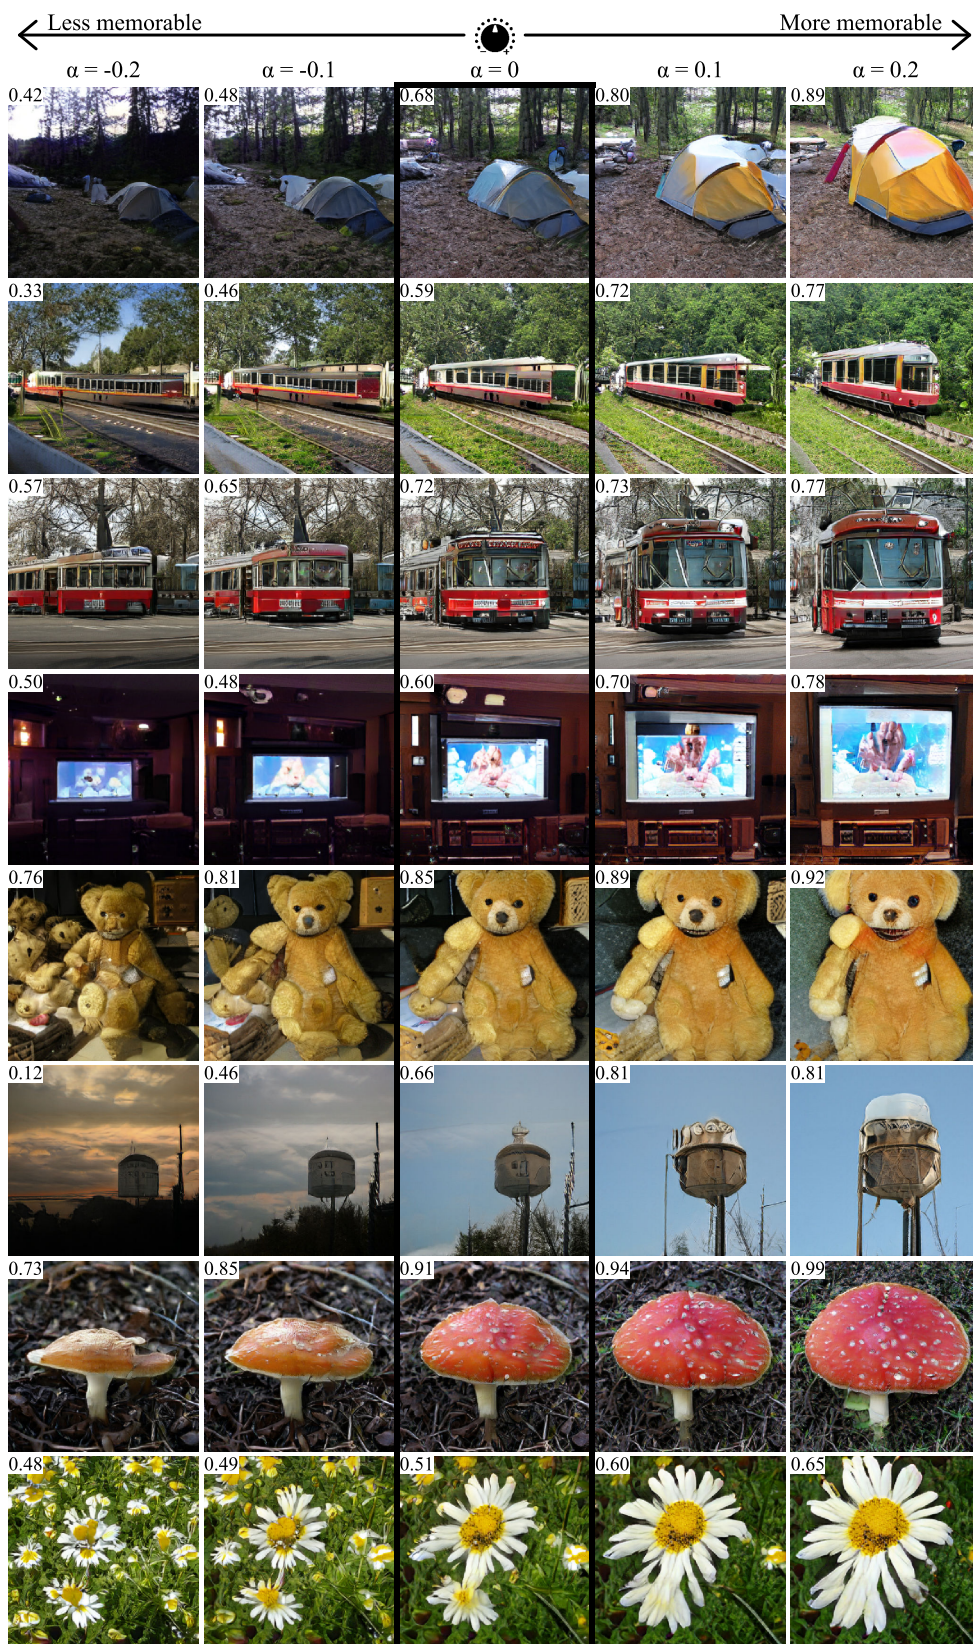

**Figure S3. More examples of generated images along the memorability dimension.** The middle column represents  $G(z, y)$ , the generated image serving as the original seed to create a series of clone images more or less memorable.



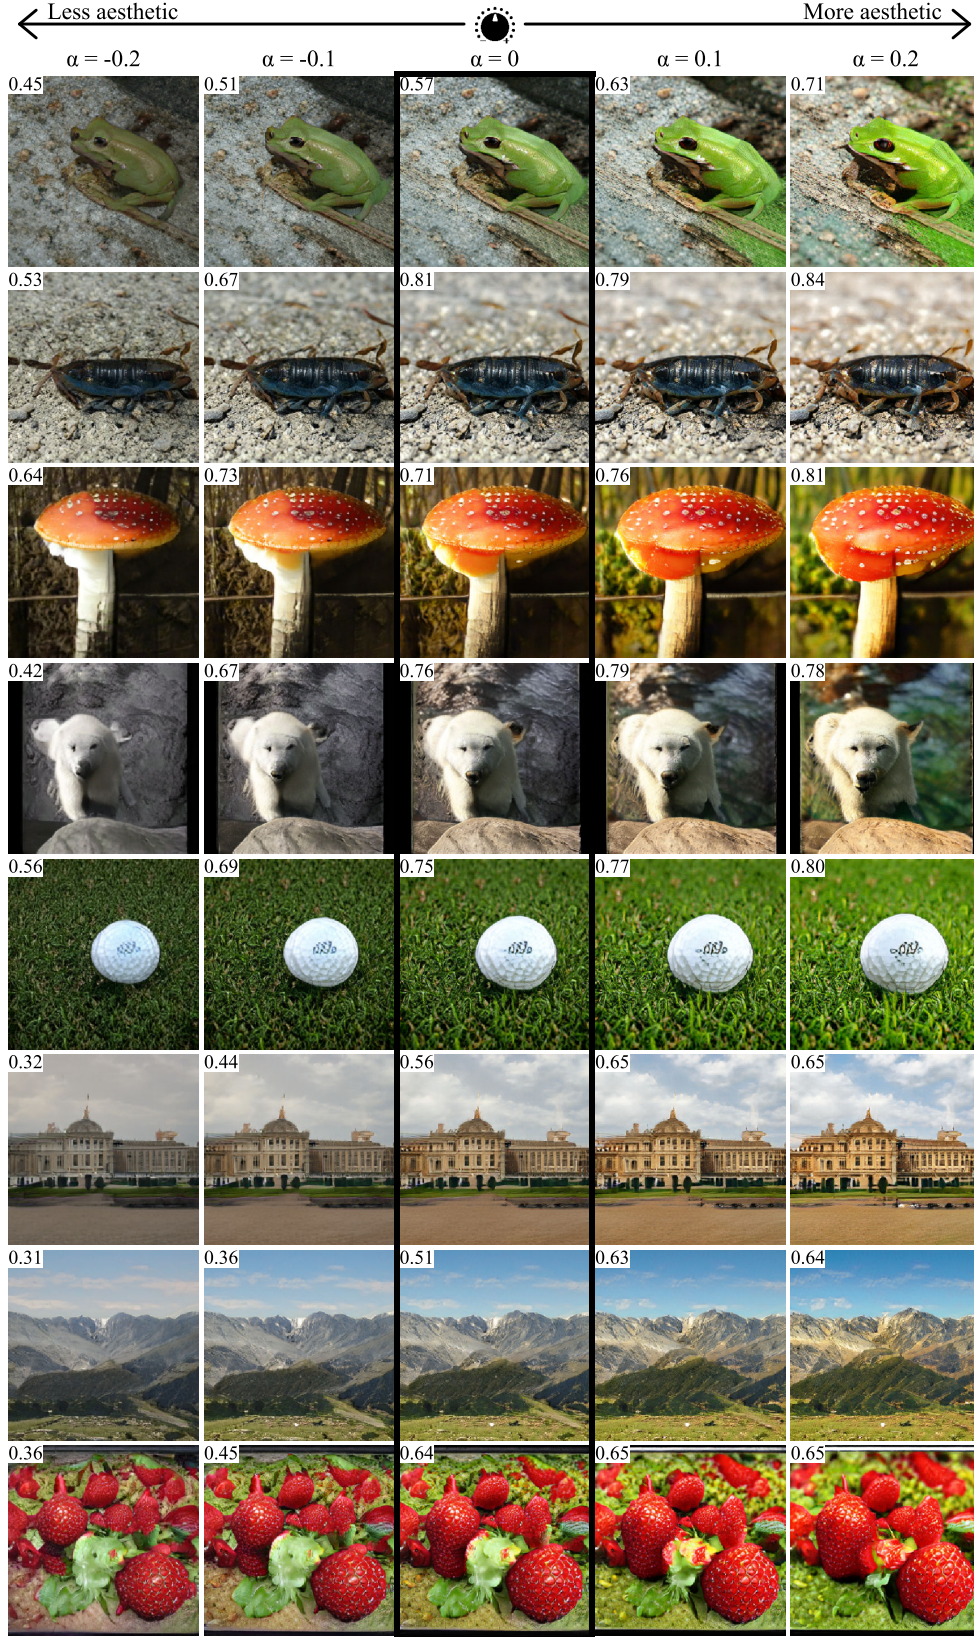

**Figure S4. More examples of generated images along the aesthetics dimension.** The middle column represents  $G(\mathbf{z}, \mathbf{y})$ , the generated image serving as the original seed to create a series of clone images more or less aesthetic.



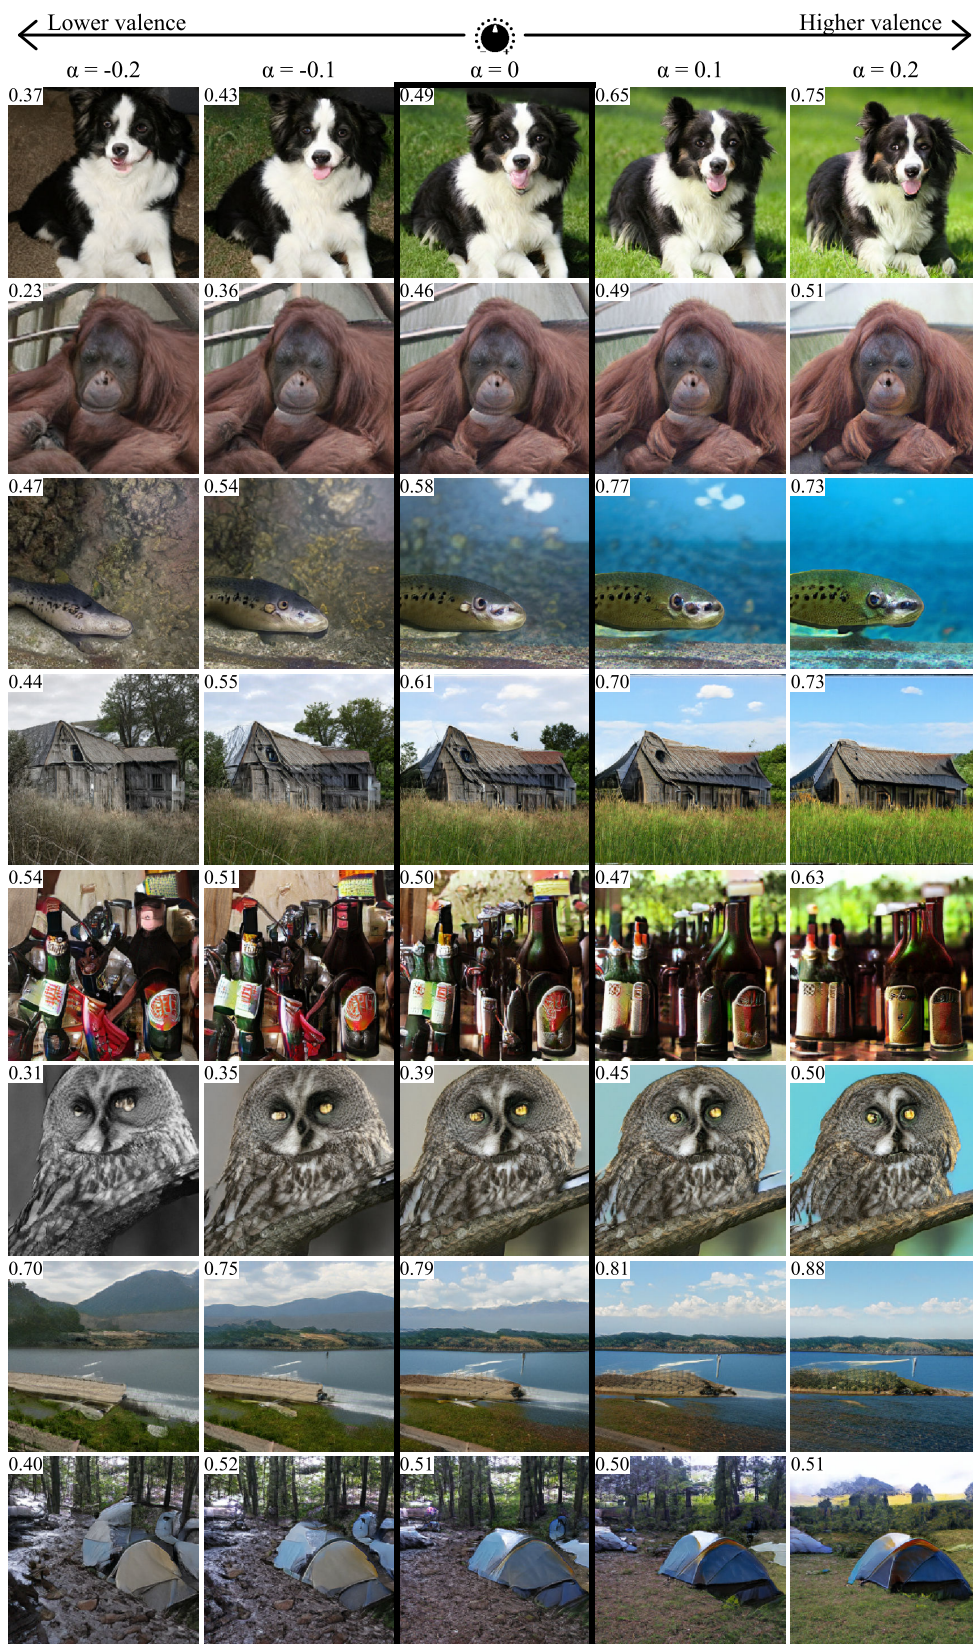

**Figure S5. More examples of generated images** along the emotional valence dimension. The middle column represents  $G(\mathbf{z}, \mathbf{y})$ , the generated image serving as the original seed to create a series of clone images higher or lower in emotional valence.
